# Supplementary material for: Naphthalimide-based fluorescent photoinduced electron transfer sensors for saccharides
Source: Royal Society of Chemistry journal article supplement (doi:10.1039/c4ra13414a), 2014-12-04
Supplement: c4ra13414a1.pdf [file c4ra13414a1.pdf]

# **Naphthalimide-based fluorescent photoinduced electron transfer sensors for saccharides**

Shanshan Liu, Hongyan Bai, Qian Sun, Weibing Zhang, Junhong Qian\*

*Shanghai Key Laboratory of Functional Materials Chemistry, School of Chemistry  
and Molecular Engineering, East China University of Science and Technology,  
Shanghai 200237, China*

E-mail: junhongqian@ecust.edu.cn

## **Supporting Information**

### **Contents**

|                                                                                 |     |
|---------------------------------------------------------------------------------|-----|
| Experimental-----                                                               | S2  |
| Fluorescence intensity vs. probe concentration-----                             | S3  |
| Solvent effect on absorption and emission spectra of PET-S2-----                | S4  |
| The pH effect on absorption and emission spectra of PET-S2-----                 | S5  |
| pH effect on the absorption and emission maxima of PET-S1 -----                 | S6  |
| Sugar effect on the fluorescence intensity of PET-S2 -----                      | S7  |
| Sugar effect on the fluorescence intensity of PET-S1 -----                      | S8  |
| Linear relationship between fluorescence intensity and sugar concentration----- | S9  |
| Selectivity and competition of PET-S1 toward fructose-----                      | S10 |
| NMR and ESI spectra of PET-S1-2 -----                                           | S11 |
| Photophysical properties of PET-S1-2 in different media -----                   | S13 |

## **Experimental**

### **Reagents**

Unless otherwise specified, all the commercial reagents were of analytical grade and used without further purification. All the chemicals were purchased from Aladdin Corporation. Beverages were from Hangzhou Tinghsin Food Co., Ltd. Milk vetch honey was from Shanghai Guanshengyuan Food Co., Ltd. Ultra-pure water was prepared through Sartorius Arium 611DI system.

### **Characterization and measurement**

NMR spectra were performed with a Bruker AV-400 spectrometer (400 M Hz). Mass spectra were recorded on a MA 1212 Instrument under standard condition (ESI, 70 eV). Absorption spectra were measured with an Evolution 220 UV-vis spectrophotometer (Thermo Scientific). Fluorescence spectra were carried out on a Lumina Fluorescence Spectrometer (Thermo Scientific), all the fluorescence spectra were uncorrected. The experiments were performed at 25 °C using nondegassed samples.

### **Absorbance and Fluorescence titration**

Accurately weighted amount of compounds PET-S1 or PET-S2 were dissolved in DMF to obtain  $1 \times 10^{-3}$  M stock solutions. The stock solution was diluted with PBS to acquired 10  $\mu$ M dye solutions.

Sugars were dissolved in phosphate buffer solution (PBS) to obtain stock solutions (6.0 M). 0–150  $\mu$ L of sugar solutions were added into 3 mL of  $1 \times 10^{-5}$  M dye buffer solution (50 mM, pH 7.4) to make [sugar] = 0 ~ 300 mM. The pH was adjusted with HCl or NaOH aqueous solution.

### **Fluorescent detection of spiked fructose in beverages**

Kangshifu sugar Sydney and Kangshifu honey grapefruit were respectively 30-fold and 50-fold diluted with PBS. Stock solutions of PET-S1 and a known concentration of fructose were added to 3 mL of the above diluted beverage solution to make [PET-S1] = 10  $\mu$ M. The fructose concentrations were acquired by comparing the fluorescence intensity at 530 nm to the titration curve.

### **Determination of the detection limit**

The detection limit (LOD) was obtained by  $3S_b/k$ , where  $S_b$  is the standard deviation of the blank measurements of 10 times, and k is the slope of the fitted line.

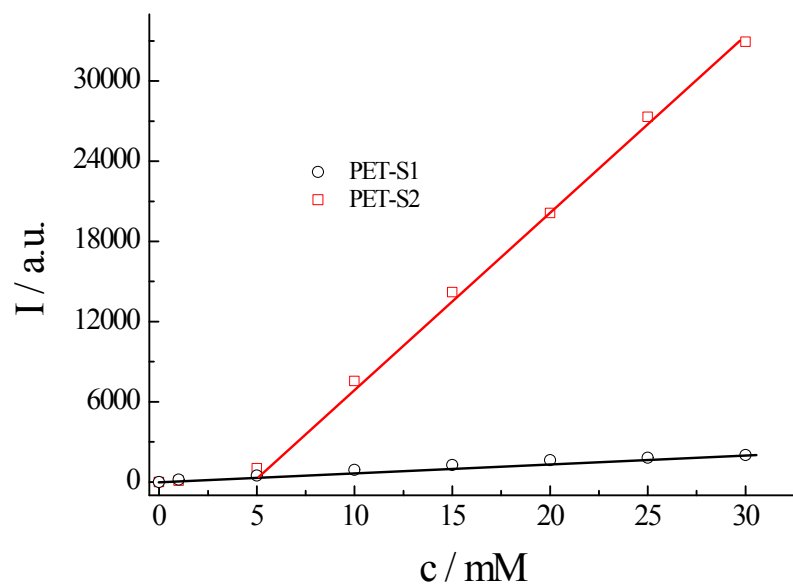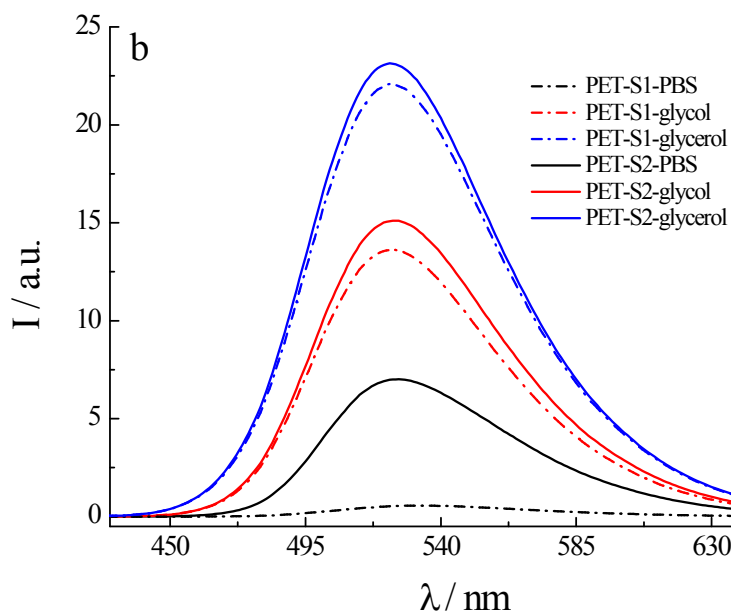

**Fig. S1** The curves of  $I_{530} \sim c$  for PET-S1 and PET-S2 (a) and emission spectra (b) of PET-S1 and PET-S2 in various media,  $[PET-S1] = [PET-S2] = 10 \mu M$ ,  $\lambda_{ex} = 400 nm$ .

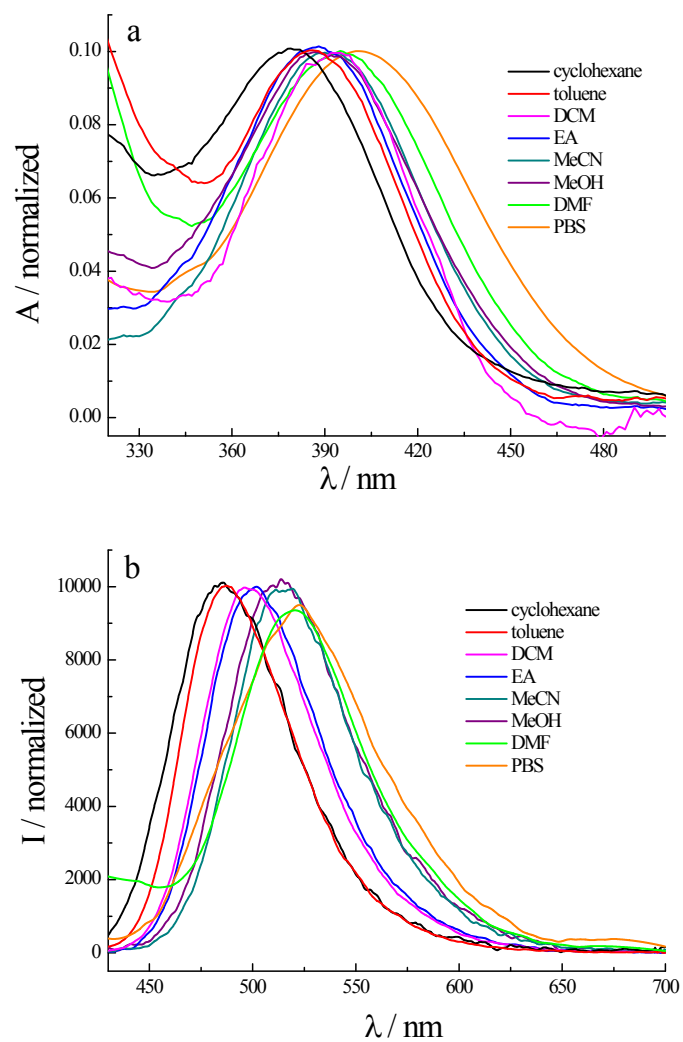

**Fig. S2** Normalized absorption (a) and emission (b) spectra of PET-S2 in various solvents.

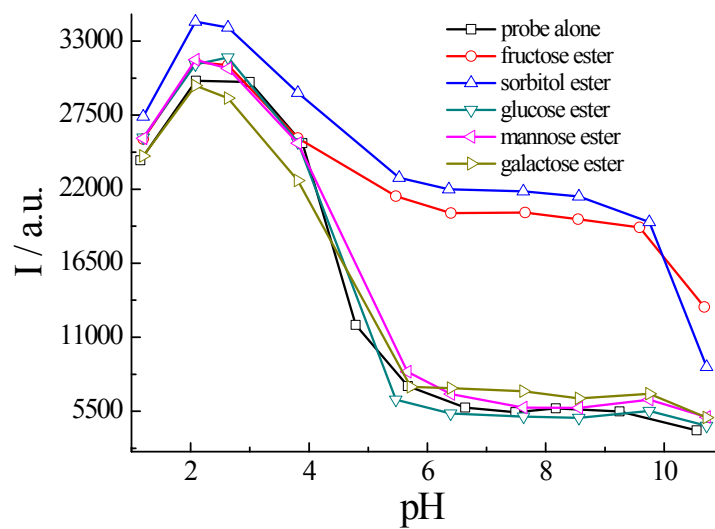

**Fig. S3** The fluorescence intensity pH profiles of PET-S2 in the absence and presence sugars.

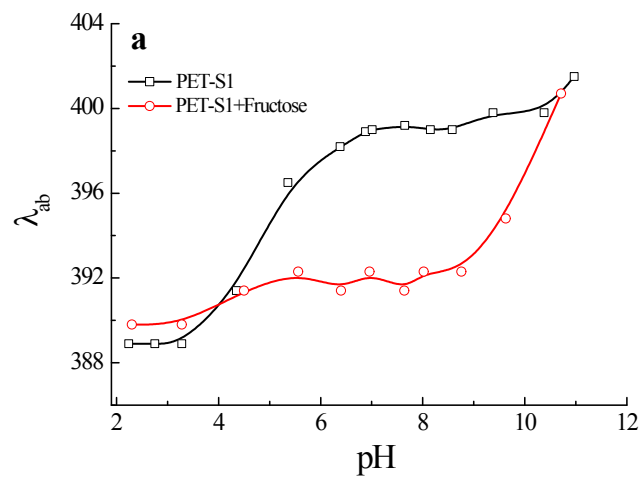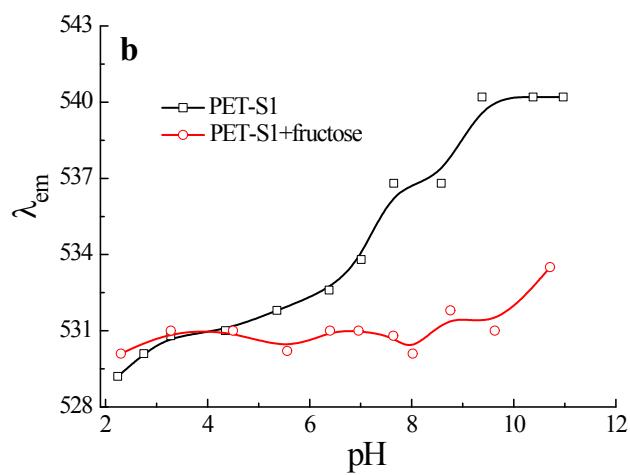

**Fig. S4** pH effect on absorption (a) and emission (b) maxima of PET-S1 in the absence and presence of D-fructose. [PET-S1] = 10  $\mu$ M, [D-fructose] = 100 mM, 50 mM PBS, pH 7.4.

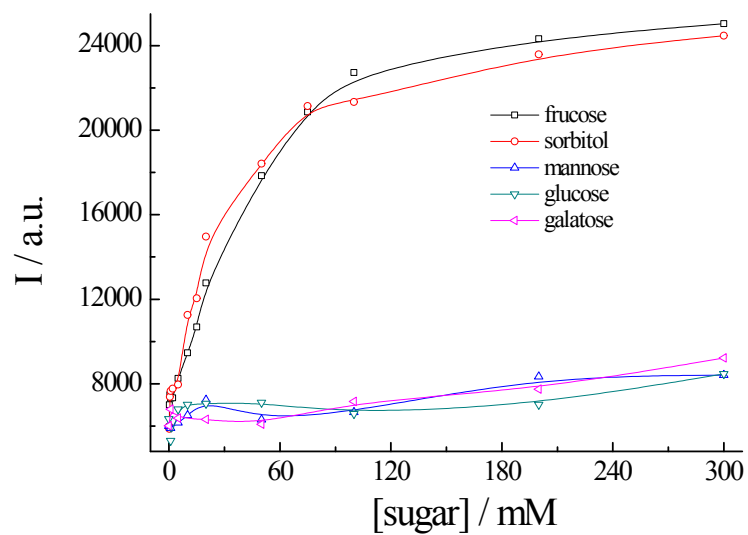

**Fig. S5** The fluorescence intensity changes of PET-S2 as a function of sugar concentration. [PET-S2] = 10  $\mu$ M, 50 mM PBS, pH 7.4.

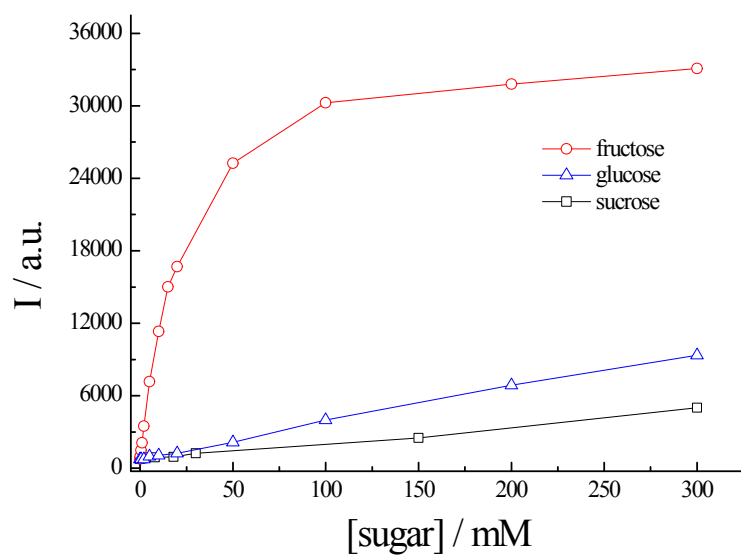

**Fig. S6** The fluorescence intensity changes of PET-S1 as a function of sugar concentration. [PET-S1] = 10  $\mu$ M, 50 mM PBS, pH 7.4.



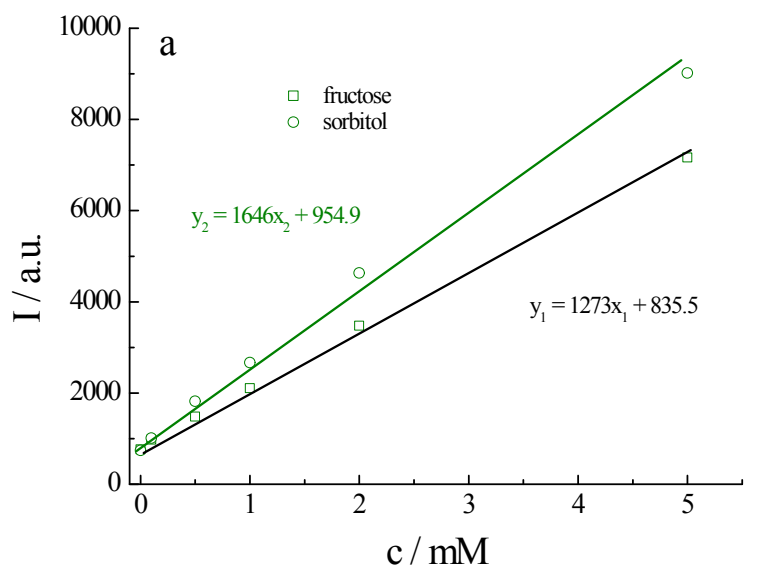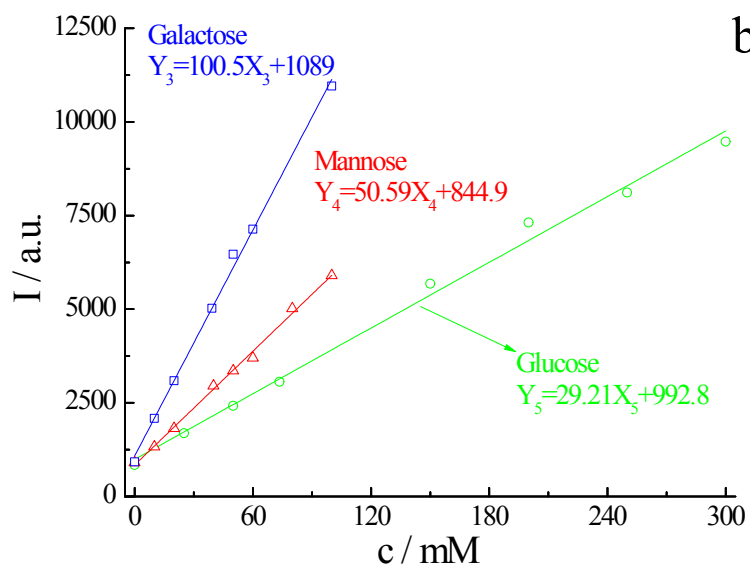

**Fig. S7** The linear relationship between the fluorescence intensity ( $I_{530}$ ) and the sugar concentration. [PET-S1] = 10  $\mu$ M, 50 mM PBS, pH 7.4.

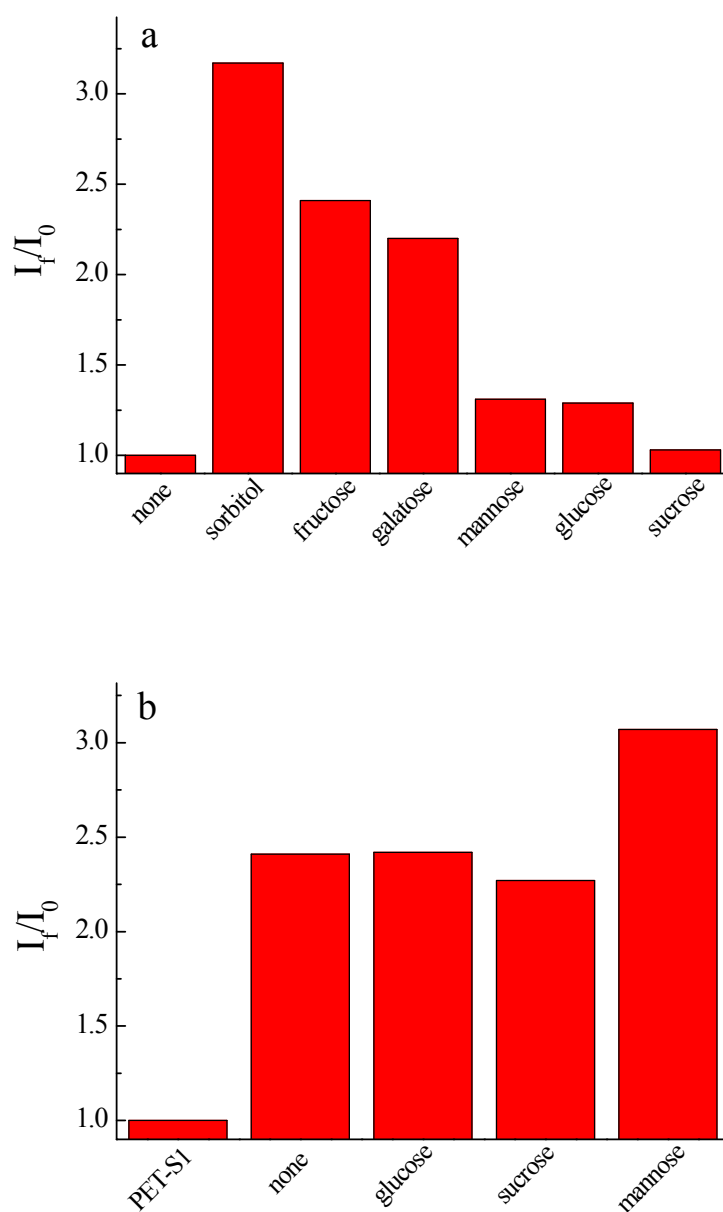

**Fig. S8** The fluorescence intensity of PET-S1 without and with sugars (a) and the fluorescence intensity of PET-S1-fructose without and with other sugars (b). [PET-S1] = 10  $\mu$ M, [fructose] = [sorbitol] = 1 mM, the concentrations of other sugars are 10 mM, 50 mM PBS, pH 7.4,  $\lambda_{em}$  = 530 nm.

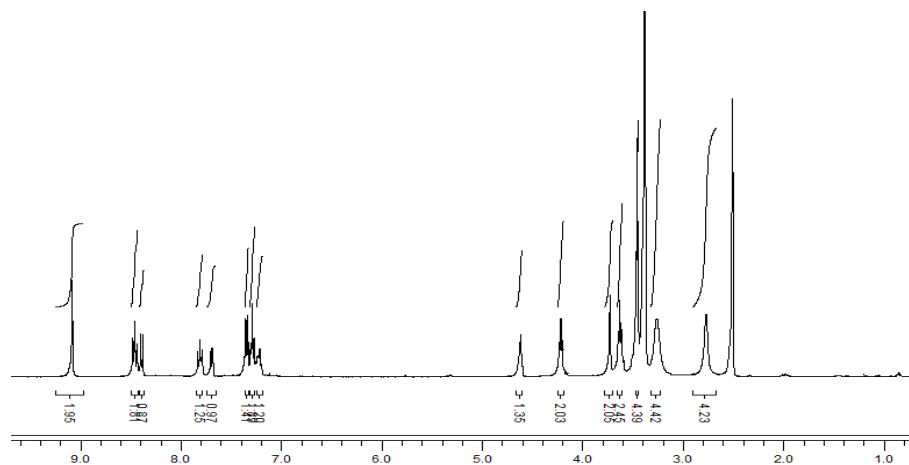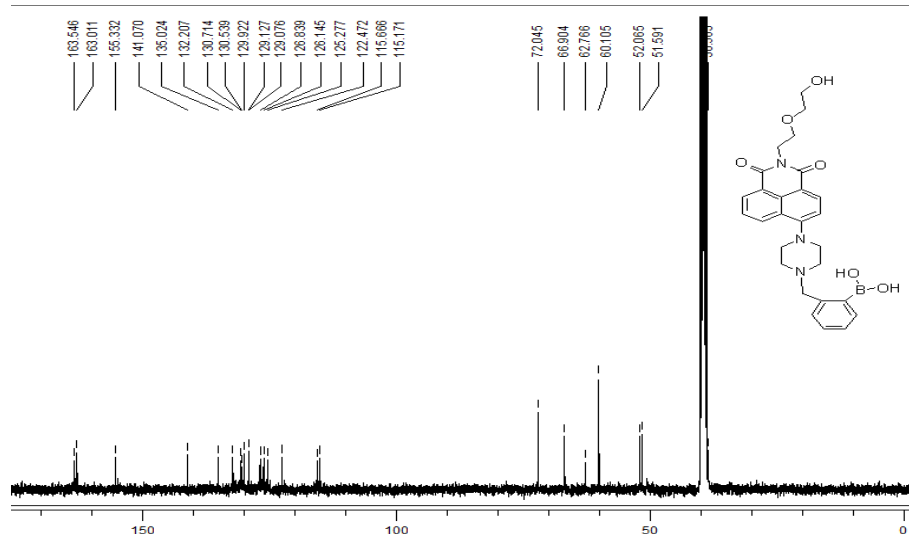

Monoisotopic Mass, Even Electron Ions  
 360 formula(e) evaluated with 32 results within limits (up to 1 closest results for each mass)  
 Elements Used:  
 C: 0-40 H: 0-40 N: 0-3 O: 0-12 B: 0-1

WB-ZHANG

ECUST institute of Fine Chem

20-Dec-2013

14:20:41

ZWB-BHY-3 19 (0.205) Cm (8:24)

1: TOP MS ES+

5.47e+003

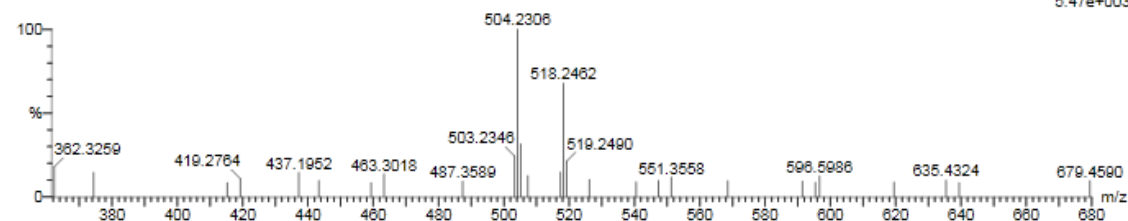

| Mass     | Calc. Mass | mDa | PPM | DBE  | i-FIT | i-FIT (Norm) | Formula         |
|----------|------------|-----|-----|------|-------|--------------|-----------------|
| 504.2306 | 504.2306   | 0.0 | 0.0 | 14.5 | 22.8  | 0.0          | C27 H31 N3 O6 B |

Fig. S9 <sup>1</sup>H NMR, <sup>13</sup>C NMR and ESI spectra of PET-S1.

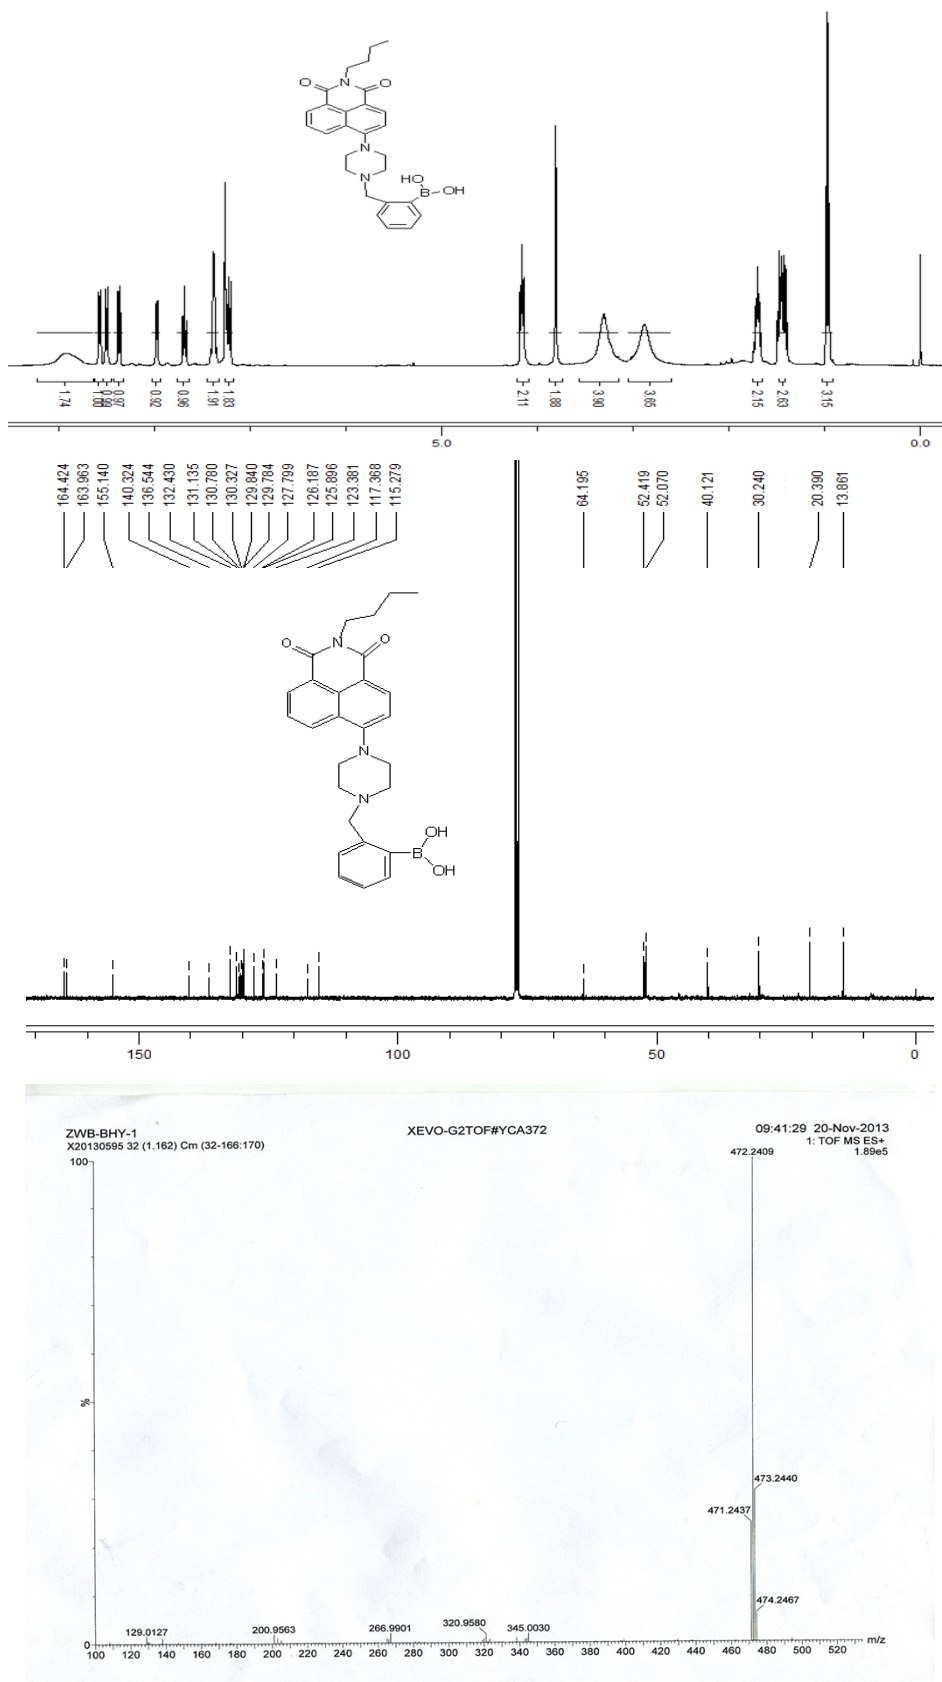

**Fig. S10** <sup>1</sup>H NMR, <sup>13</sup>C NMR and ESI spectra of PET-S2.

Table S1 The absorption and emission wavelengths, Stokes shifts and fluorescence quantum yields<sup>a</sup> of PET-S1 and PET-S2 in various solvents<sup>b</sup>.

| compound      |                      | Cyclo-<br>hexane | toluene | dichloro-<br>methane | Ethyl-<br>acetate | acetonitrile | DMF   | methanol | PBS   |
|---------------|----------------------|------------------|---------|----------------------|-------------------|--------------|-------|----------|-------|
| <b>PET-S1</b> | $\lambda_{ab}$ / nm  | 383              | 389     | 388                  | 389               | 393          | 394   | 389      | 399   |
|               | $\lambda_{em}$ / nm  | 486              | 492     | 500                  | 503               | 520          | 518   | 520      | 540   |
|               | Stokes shift /<br>nm | 103              | 103     | 112                  | 114               | 127          | 124   | 131      | 141   |
|               | $\Phi_f$             | 0.078            | 0.286   | 0.259                | 0.157             | 0.043        | 0.033 | 0.022    | 0.007 |
| <b>PET-S2</b> | $\lambda_{ab}$ / nm  | 380              | 386     | 394                  | 388               | 391          | 395   | 394      | 401   |
|               | $\lambda_{em}$ / nm  | 485              | 488     | 496                  | 502               | 515          | 519   | 514      | 521   |
|               | Stokes shift /<br>nm | 105              | 102     | 102                  | 114               | 124          | 124   | 120      | 120   |
|               | $\Phi_f$             | 0.117            | 0.526   | 0.510                | 0.347             | 0.199        | 0.047 | 0.105    | 0.065 |

<sup>a</sup> Coumarin 153 ( $\Phi_f = 0.38$  in ethanol) was used as the reference; <sup>b</sup> containing 1% DMF.
